# Supplementary material
Source: PubMed Central journal article supplement (PMC7404834)
Supplement: Supp_Fig1.pdf [file Supp_Fig1.pdf]

## Supplementary Data

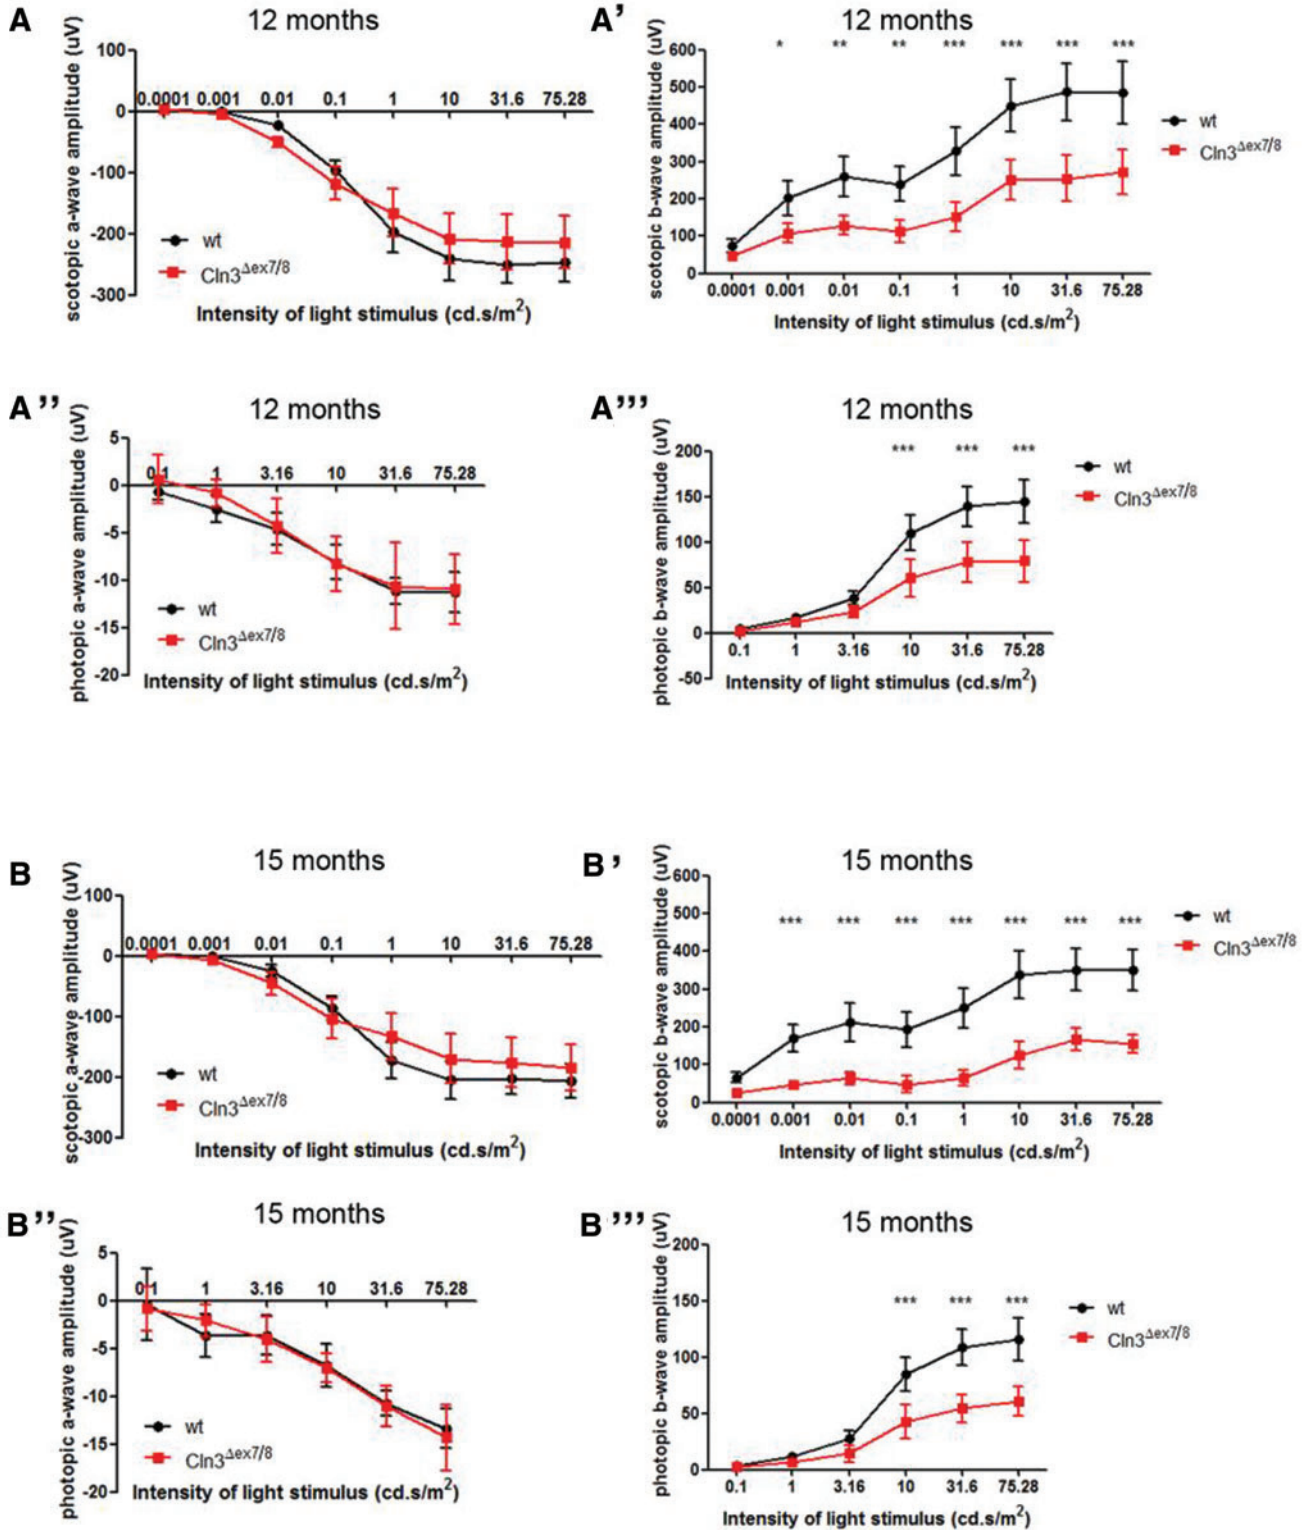

**Supplementary Figure S1.** Full ERG analysis of *Cln3*<sup>Δex7/8</sup> and wild-type mice over time. Scotopic and photopic ERG recordings at all light intensities at 12 months (**A–A'''**) and 15 months (**B–B'''**) in *Cln3*<sup>Δex7/8</sup> and wild-type mice. The scotopic and photopic b-wave amplitudes were significantly reduced in mutant mice compared with wild-type controls at 12 and 15 months. No significant differences were detected in the scotopic and photopic a-wave amplitudes over time. Wild type:  $n=7-8$  eyes, *Cln3*<sup>Δex7/8</sup>:  $n=6$  eyes. Two-way ANOVA with Bonferroni test (\* $p < 0.05$ , \*\* $p < 0.01$ , \*\*\* $p < 0.001$ ). ANOVA, analysis of variance; ERG, electroretinography.
