# Supplementary material
Source: PubMed Central journal article supplement (PMC7404834)
Supplement: Supp_Fig2.pdf [file Supp_Fig2.pdf]

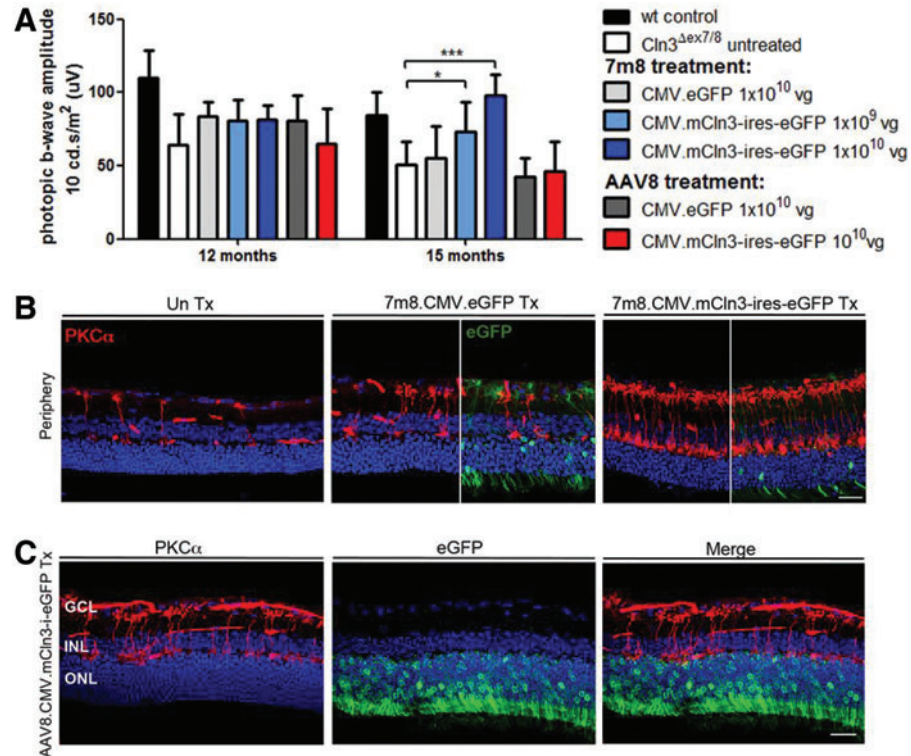

**Supplementary Figure S2.** ERG recordings and retinal histology of treated mutant eyes. **(A)** Photopic b-wave amplitudes of *Cln3*<sup>Δex7/8</sup> following intravitreal injections with 7m8.CMV.mCln3-ires-eGFP and subretinal injections with AAV8.CMV.mCln3-ires-eGFP. Wild-type recordings from Fig. 1 were added as a reference. For *n* numbers see Fig. 2. Two-way ANOVA with Bonferroni test ( $*p < 0.05$ ,  $***p < 0.001$ ). **(B)** Representative confocal images of the peripheral retina from untreated, 7m8.CMV.eGFP-, and 7m8.CMV.mCln3-ires-eGFP-treated retinas at 15 months. PKC $\alpha$  immunostaining demonstrates that the intravitreal delivery of mCln3 also had a therapeutic effect on the number of bipolar cells in the periphery compared with untreated or control-treated mutant retinas. **(C)** Representative confocal images of the midretina from AAV8.CMV.mCln3-ires-eGFP-treated retinas at 15 months. Immunostaining for eGFP reveals transduced photoreceptors. Staining for PKC $\alpha$  indicates that the treatment did not prevent the loss of rod bipolar cells, which is in line with the reduced ERG b-wave amplitudes in AAV8-treated retinas. Scale bar: 25  $\mu$ m. CMV, cytomegalovirus; eGFP, enhanced green fluorescent protein; PKC $\alpha$ , protein kinase C alpha-subunit.
