# Supplementary material
Source: PubMed Central journal article supplement (PMC7404834)
Supplement: Supp_Fig3-Table1.pdf [file Supp_Fig3-Table1.pdf]

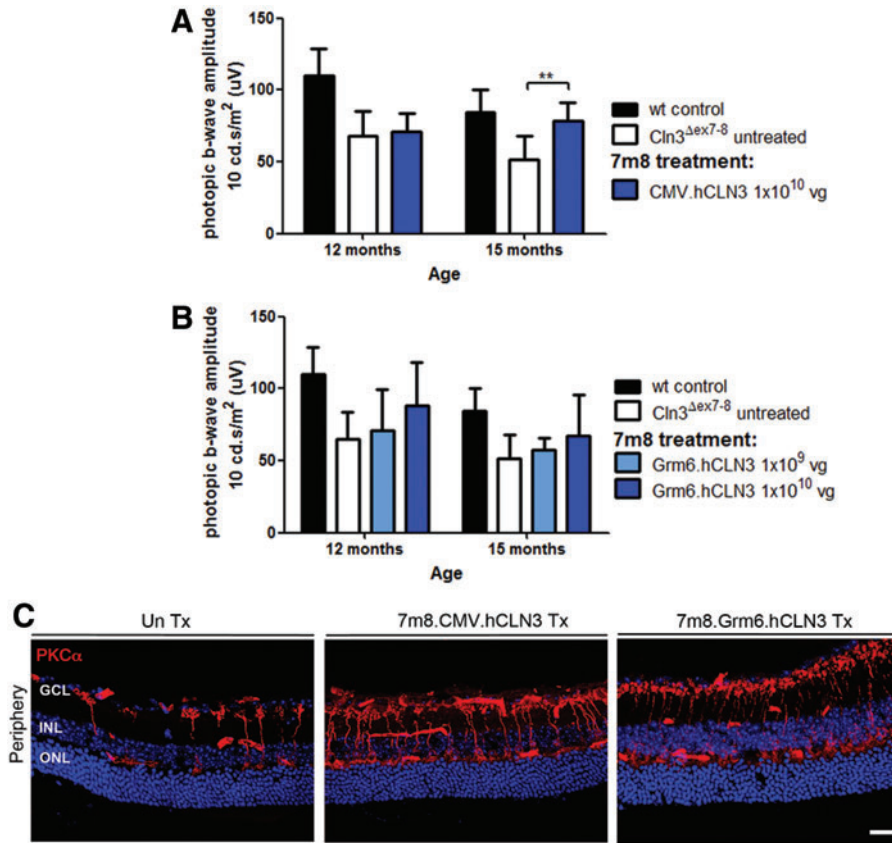

**Supplementary Figure S3.** Photopic b-wave amplitudes of treated mutant mice and histological analysis of the periphery following 7m8.hCLN3 treatment. Photopic b-wave amplitudes of *Cln3*<sup>Δex7/8</sup> mice that received intravitreal injections with 7m8.CMV.hCLN3 (**A**) and 7m8.Grm6.hCLN3 (**B**) at 12 and 15 months. 7m8.CMV.hCLN3 treatment resulted in significantly increased photopic b-wave amplitudes at 15 months, while 7m8.Grm6.hCLN3 treatment did not lead to higher b-wave amplitudes. Wild-type recordings from Fig. 1 were added as a reference. For *n* numbers see Figs. 3 and 4, respectively. Two-way ANOVA with Bonferroni test (\*\**p* < 0.01). (**C**) Representative images of the peripheral retina of untreated, 7m8.CMV.hCLN3-, and 7m8.Grm6.hCLN3-treated mutant mice at 15 months. The number of PKC $\alpha$ -positive cells is increased in the treated compared with the untreated retinas. Scale bar: 25  $\mu$ m. hCLN3, human CLN3.

**Supplementary Table S1.** Summary of scotopic b-wave amplitudes in *Cln3*<sup>Δex7/8</sup> mice that received intravitreal and subretinal injection

| Mouse strain                  | AAV treatment            | Titer (vg/eye)              | Scotopic b-wave amplitudes (mean $\pm$ SD) |                  |
|-------------------------------|--------------------------|-----------------------------|--------------------------------------------|------------------|
|                               |                          |                             | 12 Months                                  | 15 Months        |
| <i>Cln3</i> <sup>Δex7/8</sup> | 7m8.CMV.Cln3-ires-eGFP   | 1 $\times$ 10 <sup>9</sup>  | 281.2 $\pm$ 48.4                           | 192.3 $\pm$ 40.4 |
| <i>Cln3</i> <sup>Δex7/8</sup> | 7m8.CMV.Cln3-ires-eGFP   | 1 $\times$ 10 <sup>10</sup> | 278 $\pm$ 65.1                             | 283.9 $\pm$ 52.5 |
| <i>Cln3</i> <sup>Δex7/8</sup> | 7m8.CMV.hCLN3            | 1 $\times$ 10 <sup>10</sup> | 253 $\pm$ 51.3                             | 251.4 $\pm$ 73.1 |
| <i>Cln3</i> <sup>Δex7/8</sup> | 7m8.Grm6.hCLN3           | 1 $\times$ 10 <sup>9</sup>  | 204.5 $\pm$ 60                             | 186.3 $\pm$ 67.4 |
| <i>Cln3</i> <sup>Δex7/8</sup> | 7m8.Grm6.hCLN3           | 1 $\times$ 10 <sup>10</sup> | 239.2 $\pm$ 60                             | 206.6 $\pm$ 121  |
| <i>Cln3</i> <sup>Δex7/8</sup> | 7m8.CMV.eGFP             | 1 $\times$ 10 <sup>10</sup> | 174.2 $\pm$ 41.1                           | 99.7 $\pm$ 27    |
| <i>Cln3</i> <sup>Δex7/8</sup> | AAV8.CMV.mCln3-ires-eGFP | 1 $\times$ 10 <sup>10</sup> | 175.2 $\pm$ 54.5                           | 109.3 $\pm$ 55.1 |
| <i>Cln3</i> <sup>Δex7/8</sup> | AAV8.CMV.eGFP            | 1 $\times$ 10 <sup>10</sup> | 172 $\pm$ 61.5                             | 93 $\pm$ 40.6    |
| <i>Cln3</i> <sup>Δex7/8</sup> | —                        | —                           | 154.5 $\pm$ 37.4                           | 79.9 $\pm$ 31.9  |
| Wild type                     | —                        | —                           | 327.6 $\pm$ 64                             | 249.5 $\pm$ 51.3 |

Overview of the mean  $\pm$  SD of the scotopic b-wave amplitudes (at 1 cd.s/m<sup>2</sup>) in all AAV-treated mutant mice over time. Untreated mutant and wild-type controls were added as a reference from Fig. 2.

AAV, adeno-associated virus; CMV, cytomegalovirus; eGFP, enhanced green fluorescent protein; hCLN3, human CLN3; ires, internal ribosome entry site; SD, standard deviation.
