# Supplementary material
Source: PubMed Central journal article supplement (PMC7404834)
Supplement: Supp_Table2.pdf [file Supp_Table2.pdf]

**Supplementary Table S2. Summary of photopic b-wave amplitudes in  $Cln3^{\Delta ex7/8}$  mice that received intravitreal and subretinal injection**

| Mouse strain          | AAV treatment            | Titer (vg/eye)     | Photopic b-wave amplitudes (mean $\pm$ SD) |                 |
|-----------------------|--------------------------|--------------------|--------------------------------------------|-----------------|
|                       |                          |                    | 12 Months                                  | 15 Months       |
| $Cln3^{\Delta ex7/8}$ | 7m8.CMV.Cln3-ires-eGFP   | $1 \times 10^9$    | 80.8 $\pm$ 13.7                            | 73.5 $\pm$ 20.2 |
| $Cln3^{\Delta ex7/8}$ | 7m8.CMV.Cln3-ires-eGFP   | $1 \times 10^{10}$ | 81.1 $\pm$ 10.1                            | 98.25 $\pm$ 14  |
| $Cln3^{\Delta ex7/8}$ | 7m8.CMV.hCLN3            | $1 \times 10^{10}$ | 71 $\pm$ 12.8                              | 78.5 $\pm$ 12.6 |
| $Cln3^{\Delta ex7/8}$ | 7m8.Grm6.hCLN3           | $1 \times 10^9$    | 70.8 $\pm$ 28.8                            | 57.5 $\pm$ 8.2  |
| $Cln3^{\Delta ex7/8}$ | 7m8.Grm6.hCLN3           | $1 \times 10^{10}$ | 88 $\pm$ 30                                | 67.5 $\pm$ 28   |
| $Cln3^{\Delta ex7/8}$ | 7m8.CMV.eGFP             | $1 \times 10^{10}$ | 83.8 $\pm$ 9.4                             | 55.6 $\pm$ 21.6 |
| $Cln3^{\Delta ex7/8}$ | AAV8.CMV.mCln3-ires-eGFP | $1 \times 10^{10}$ | 65.2 $\pm$ 23.5                            | 46.6 $\pm$ 19.9 |
| $Cln3^{\Delta ex7/8}$ | AAV8.CMV.eGFP            | $1 \times 10^{10}$ | 80.4 $\pm$ 17.8                            | 42.3 $\pm$ 13.4 |
| $Cln3^{\Delta ex7/8}$ | —                        | —                  | 64.2 $\pm$ 21                              | 50.9 $\pm$ 15.2 |
| Wild type             | —                        | —                  | 110 $\pm$ 18.9                             | 84.8 $\pm$ 15.2 |

Overview of the mean  $\pm$  SD of the photopic b-wave amplitudes (at 10 cd.s/m<sup>2</sup>) in all AAV-treated mutant mice over time. Untreated mutant and wild-type controls were added as a reference from Fig. 2.
